# Supplementary material
Source: publisher figshare collection journal article supplement (https://frontiersin.figshare.com/ndownloader/files/27878673)
Supplement: Supplementary file [file 27878673]

| Donor | Timepoint | Number of UMI's | CDR3 $\beta$   | V $\beta$ | J $\beta$ |
|-------|-----------|-----------------|----------------|-----------|-----------|
| 1     | <72h      | 2               | CASSIRSSYEQYF  | VB19      | JB2-7     |
|       |           |                 |                |           |           |
|       | 14d       | 1               | CASSIRSSYEQYF  | VB19      | JB2-7     |
|       |           | 4               | CASSSRAADTQYF  | VB19      | JB2-3     |
|       |           | 2               | CASSTRSTDTQYF  | VB19      | JB2-3     |
|       |           |                 |                |           |           |
|       | 8w        | 1               | CASSARAAYEQYF  | VB19      | JB2-7     |
|       |           | 1               | CASSARGADTQYF  | VB19      | JB2-3     |
|       |           | 1               | CASSARSAYEQYF  | VB19      | JB2-7     |
|       |           | 1               | CASSFRAAYEQYF  | VB19      | JB2-7     |
|       |           | 2               | CASSIRGAYEQYF  | VB19      | JB2-7     |
|       |           | 4               | CASSIRSAYEQYF  | VB19      | JB2-7     |
|       |           | 16              | CASSSRAADTQYF  | VB19      | JB2-3     |
|       |           | 1               | CASSSRAAYEQYF  | VB19      | JB2-7     |
| 2     | <72h      | 1               | CASSIGTGEQFF   | VB19      | JB2-1     |
|       |           | 8               | CASSIRSAYEQYF  | VB19      | JB2-7     |
|       |           | 6               | CASSIRSSYEQYF  | VB19      | JB2-7     |
|       |           | 1               | CASSMRSSYEQYF  | VB19      | JB2-7     |
|       |           | 6               | CASSSFYLNEQFF  | VB19      | JB2-1     |
|       |           |                 |                |           |           |
|       | 14d       | 1               | CASSIRSAYEQYF  | VB19      | JB2-7     |
|       |           | 1               | CASSIRSSYEQYF  | VB19      | JB2-7     |
|       |           | 1               | CASSMRSSYEQYF  | VB19      | JB2-7     |
|       |           | 1               | CASSQLAGWDEQYF | VB27      | JB2-7     |
|       | 8w        | 3               | CASSYMSSGNTIYF | VB19      | JB1-3     |
|       |           |                 |                |           |           |

**Supplemental table 1a. GILG+ T cell clones of CMV- individuals**

| Donor | Timepoint | Number of UMI's | CDR3β             | Vβ     | Jβ    |
|-------|-----------|-----------------|-------------------|--------|-------|
| 3     | <72h      | 3               | CARPWRLSGANVLTf   | VB24-1 | JB2-6 |
|       |           | 1               | CASSIRSSDEQYF     | VB19   | JB2-7 |
|       |           | 1               | CASSIRSSYEQYF     | VB19   | JB2-7 |
|       |           | 1               | CASSSRSAETQYF     | VB19   | JB2-5 |
|       |           | 1               | CASSSRSSSETQYF    | VB19   | JB2-3 |
|       |           | 1               | CASSSRSSGELFF     | VB19   | JB2-2 |
|       | 14d       | 1               | CARPWRLSGANVLTf   | VB24-1 | JB2-6 |
|       |           | 1               | CASSIIAGGQGGGQPHF | VB19   | JB1-5 |
|       |           | 1               | CASSIRSSYEQYF     | VB19   | JB2-7 |
|       |           | 1               | CASSSRSTDEQYF     | VB19   | JB2-3 |
|       |           | 1               | CASSTRSSGELFF     | VB19   | JB2-2 |
|       |           | 2               | CASTKGVYTYQYF     | VB12-4 | JB2-3 |
|       | 8w        | 2               | CASSIRSSYEQYF     | VB19   | JB2-7 |
| 4     | <72h      | 2               | CASSVRSSYEQYF     | VB19   | JB2-7 |
|       | 14d       | 2               | CASSARSTGELFF     | VB19   | JB2-2 |
|       |           | 1               | CASSIRSADEQFF     | VB19   | JB2-1 |
|       |           | 1               | CASSIRSAGEQFF     | VB19   | JB2-1 |
|       |           | 1               | CASSIRSAYEQYF     | VB19   | JB2-7 |
|       |           | 2               | CASSIRSSDEQYF     | VB19   | JB2-7 |
|       |           | 3               | CASSIRSSYEQYF     | VB19   | JB2-7 |
|       |           | 1               | CASSIRSTDEQYF     | VB19   | JB2-3 |
|       |           | 5               | CASSIRSTGELFF     | VB19   | JB2-2 |
|       |           | 1               | CASSIRSTGEQFF     | VB19   | JB2-2 |
|       |           | 1               | CASSIRSTYEQYF     | VB19   | JB2-7 |
|       |           | 1               | CASSIRTSYEQYF     | VB19   | JB2-7 |
|       |           | 1               | CASSIRTTGELFF     | VB19   | JB2-2 |
|       |           | 2               | CASSMRASYEQYF     | VB19   | JB2-7 |
|       |           | 2               | CASSMRSTGELFF     | VB19   | JB2-2 |
|       |           | 1               | CASSNAGTIYEQYF    | VB18   | JB2-7 |
|       |           | 1               | CASSSRSSYEQYF     | VB19   | JB2-7 |
|       |           | 2               | CASSTRSTDTQYF     | VB19   | JB2-3 |
|       |           | 1               | CASSVRSSAYEQYF    | VB19   | JB2-7 |
|       |           | 1               | CASSVRSSYEQYF     | VB19   | JB2-7 |
|       |           | 1               | CASTVSGVTYNEQFF   | VB19   | JB2-1 |
|       |           | 1               | CAWSKGFDRARTEAFF  | VB30   | JB1-1 |
|       | 8w        | 1               | CASRGTDGPNPLHF    | VB2    | JB1-6 |
|       |           | 1               | CASSGRSTDTQYF     | VB19   | JB2-3 |
|       |           | 1               | CASSGRSTGELFF     | VB19   | JB2-2 |
|       |           | 7               | CASSHRSTGELFF     | VB19   | JB2-2 |
|       |           | 1               | CASSIGSFGYTF      | VB19   | JB1-2 |
|       |           | 1               | CASSIRSSVEQFF     | VB19   | JB2-1 |
|       |           | 6               | CASSIRSSYEQYF     | VB19   | JB2-7 |
|       |           | 1               | CASSIRSTDAQYF     | VB19   | JB2-3 |
|       |           | 1               | CASSIRSTDEQFF     | VB19   | JB2-1 |
|       |           | 2               | CASSIRSTDTQYF     | VB19   | JB2-3 |
|       |           | 1               | CASSIRSTETQYF     | VB19   | JB2-5 |
|       |           | 3               | CASSIRSTGELFF     | VB19   | JB2-2 |
|       |           | 1               | CASSIRSTYEQYF     | VB19   | JB2-7 |
|       |           | 1               | CASSLRTTDEQFF     | VB19   | JB2-1 |
|       |           | 2               | CASSLWTTDEQFF     | VB19   | JB2-1 |
|       |           | 1               | CASSMRSSYEQYF     | VB19   | JB2-7 |
|       |           | 3               | CASSMRSTGELFF     | VB19   | JB2-2 |
|       |           | 1               | CASSRRSTDEQYF     | VB19   | JB2-7 |
|       |           | 1               | CASSRRSTDTQYF     | VB19   | JB2-3 |
|       |           | 2               | CASSTRSTDEQYF     | VB19   | JB2-3 |
|       |           | 1               | CASSTRSTYEQYF     | VB19   | JB2-7 |
|       |           | 1               | CASSVRSSDEQYF     | VB19   | JB2-7 |
|       |           | 1               | CASSVRSSYEQYF     | VB19   | JB2-7 |
|       |           | 1               | CASSWRSSYEQYF     | VB19   | JB2-7 |
|       |           | 1               | CASSWRSTGELFF     | VB19   | JB2-2 |
|       |           | 1               | CAWSKGFDRARTEAFF  | VB30   | JB1-1 |

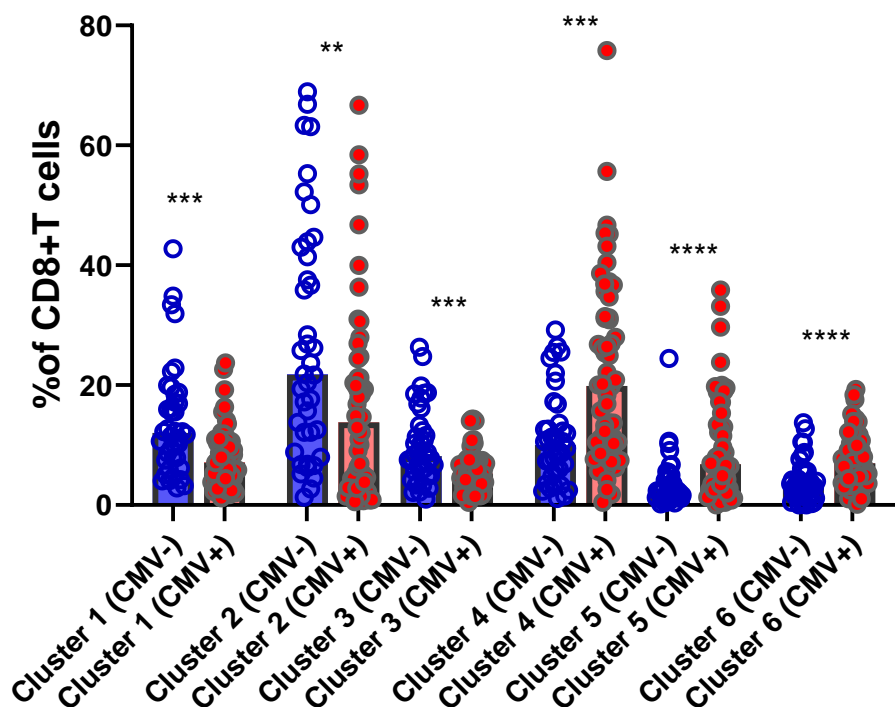

**Supplementary figure 1. Percentage of CD8+ T-cells per t-SNE cluster in CMV<sup>-</sup> and CMV<sup>+</sup> individuals.** Percentage of CD8<sup>+</sup> T cells per t-SNE cluster in CMV<sup>-</sup> (blue bars; N=40) and CMV<sup>+</sup> (red bars; N=57) individuals based on MFI of CD57, KLRG-1, CXCR3, CD95, CD127, CD45RO, CD27 and CCR7. Data shown as median. Differences between groups were compared by Mann Whitney. Stars indicate statistical differences, e.g. \* P < 0.05, \*\*P < 0.01, \*\*\*P < 0.001, \*\*\*\*P < 0.0001.



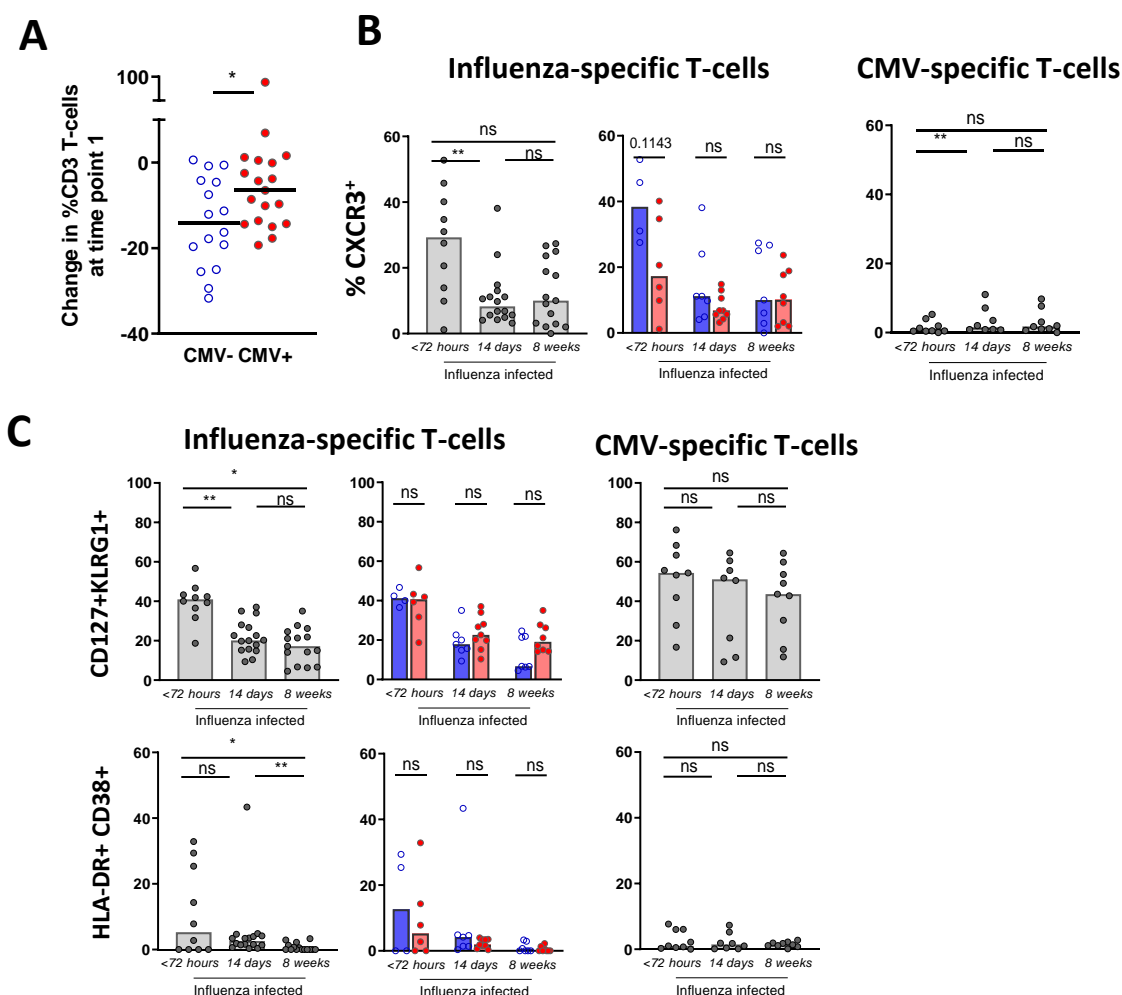

**Supplementary figure 3. Expression of activation and migration markers in T cells during influenza virus infection.** **A)** The change in percentage of CD3<sup>+</sup> T cells at time point 1 compared to time point 2 in CMV<sup>-</sup> and CMV<sup>+</sup> individuals. **B)** CXCR3<sup>+</sup> influenza-virus specific CD8<sup>+</sup> T cells upon infection (left panel) and CMV<sup>-</sup> and CMV<sup>+</sup> individuals (middle panel) and on CMV-specific CD8<sup>+</sup> T cells (right panel). **C)** The percentage of CD127-KLRG-1<sup>+</sup> and HLA-DR<sup>+</sup>CD38<sup>+</sup> influenza virus-specific CD8<sup>+</sup> T cells upon influenza infection in all HLA-A2 positive individuals upon influenza infection (left panels), or comparing CMV<sup>-</sup> (blue bars) and CMV<sup>+</sup> (red bars) (middle panels). Right panels shows CD127-KLRG-1<sup>+</sup> and HLA-DR<sup>+</sup>CD38<sup>+</sup> expression on CMV-specific CD8<sup>+</sup> T cells. Influenza virus-specific CD8<sup>+</sup> T cells were identified using a tetramer for matrix protein-1 GILG-epitope. CMV-specific CD8<sup>+</sup> T cells were identified using a tetramer for pp65 protein NLV-epitope. Wilcoxon test was used to compare time points. Differences between CMV<sup>-</sup> and CMV<sup>+</sup> individuals were tested using Mann-Whitney U test.

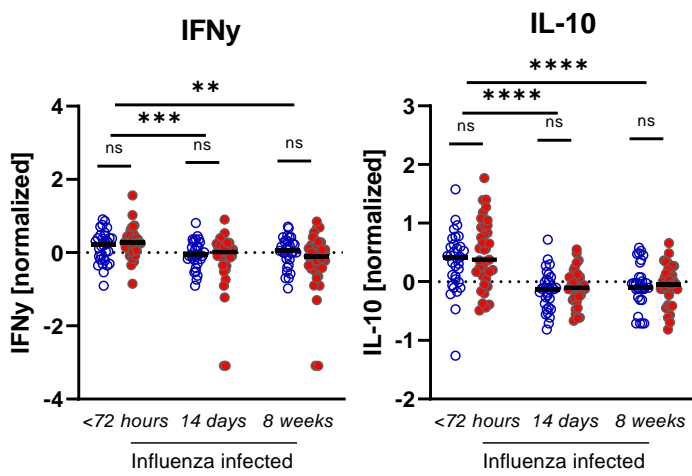

**Supplementary Figure 4. Serum levels of IFN $\gamma$  and IL-10 in CMV $^-$  and CMV $^+$  individuals after influenza virus-infection.** Serum levels of IFN $\gamma$  and IL-10 upon influenza infection for CMV $^+$  and CMV $^-$  individuals at <72hours after fever onset, and 2 and 8 weeks later. CMV $^-$  individuals are indicated with the blue open circles and the CMV $^+$  individuals in red solid circles. Serum levels of the cytokines were measured by multiplex assays and batch effects were normalized based by subtracting the mean per plate. Differences between CMV $^-$  and CMV $^+$  individuals were tested using unpaired T-test. Differences between time points were tested by Wilcoxon test.

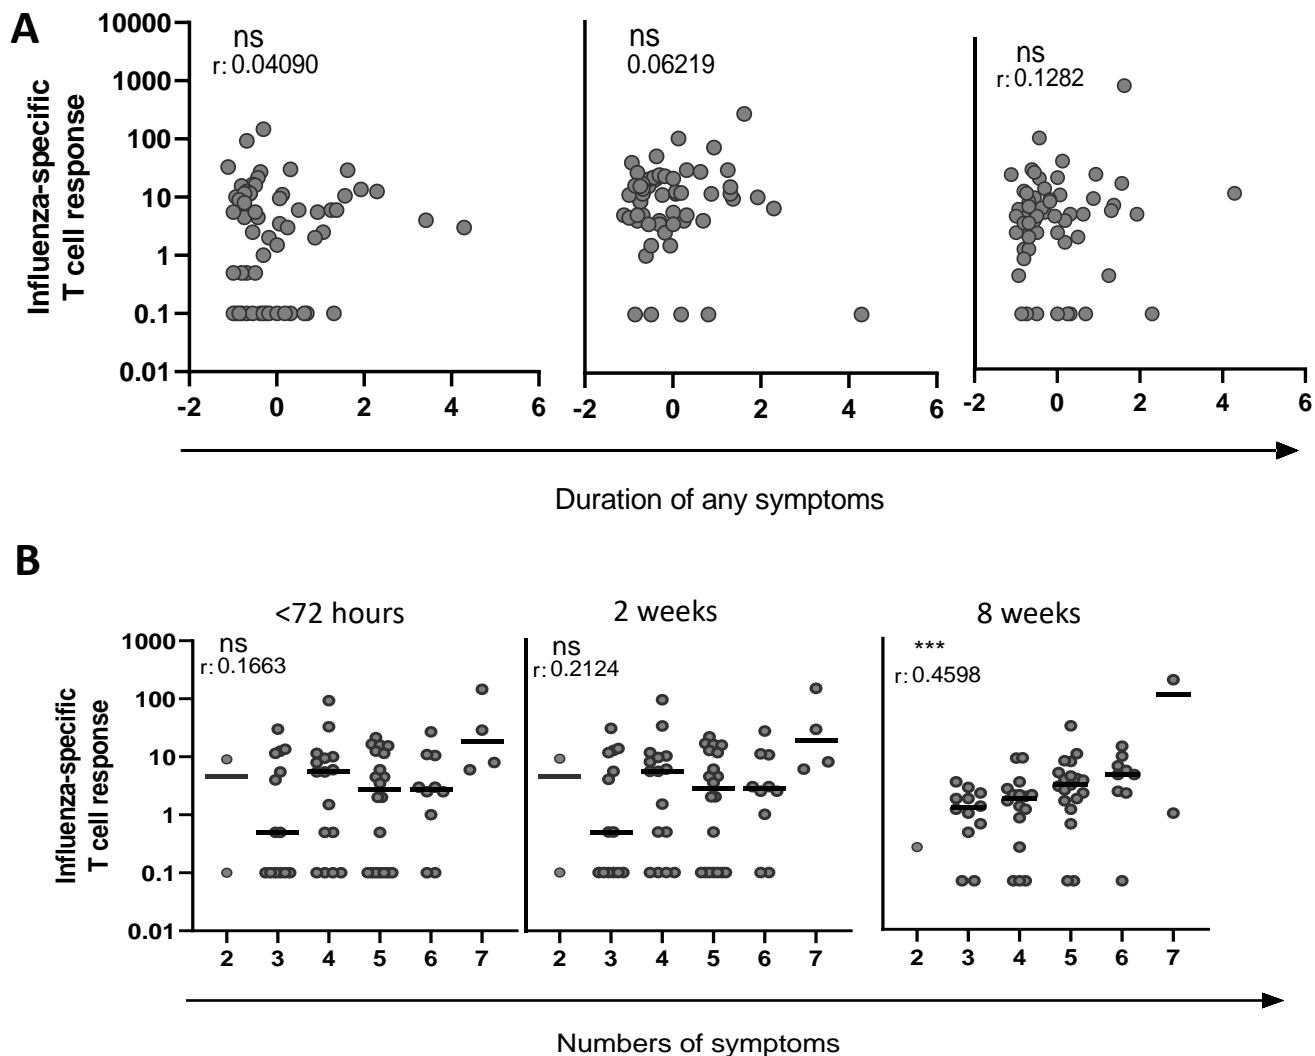

**Supplementary Figure 5. Duration of symptoms is not linked to T-cell responses to influenza virus-infection.** **A)** Association was tested for influenza-specific T-cell responses upon influenza virus infection at <72 hours after fever onset, and 2 and 8 weeks later with the duration of symptoms of influenza infection. **B)** Association was tested for influenza-specific T-cell responses upon influenza virus infection at <72 hours after fever onset, and 2 and 8 weeks later with the number of symptoms. Due to study design, participants had a minimal of two symptoms; fever ( $\geq 37.8$  °C) and at least 1 other symptoms, either cough, sore throat, runny nose, headache, pain while breathing or muscle pain. Associations was tested by Spearman correlation.
